# Supplementary material for: Scalable slot-die coated flexible supercapacitors from upcycled PET face shields
Source: Royal Society of Chemistry journal article supplement (doi:10.1039/d2ra06809e), 2024-01-01
Supplement: d2ra06809e1.pdf [file d2ra06809e1.pdf]

## Supporting Information

### Scalable Slot-die Coated Flexible Supercapacitors from Upcycled PET face shields

R. Kiran Kumar Reddy<sup>a</sup>, Andrew Callander<sup>b</sup>, Lidija Šiller<sup>c</sup>, Karen Faulds<sup>b</sup>, Leonard Berlouis<sup>a</sup>, and Aruna Ivaturi<sup>a\*</sup>

<sup>a</sup>Smart Materials Research and Device Technology (SMaRDT) Group, Department of Pure and Applied Chemistry, University of Strathclyde, Thomas Graham Building, Glasgow, G1 1XL, UK

<sup>b</sup>Centre for Molecular Nanometrology, Department of Pure and Applied Chemistry, University of Strathclyde, Technology Innovation Centre, 99 George Street, Glasgow, G1 1RD, UK

<sup>c</sup>Newcastle University, School of Engineering, Newcastle upon Tyne, NE1 7RU, UK

Corresponding author: email [aruna.ivaturi@strath.ac.uk](mailto:aruna.ivaturi@strath.ac.uk)

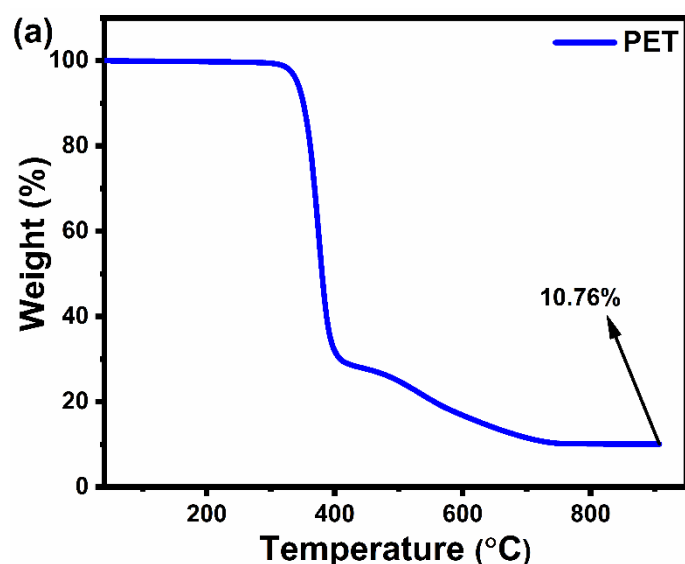

Fig. S1 (a) TGA thermogram of face shield (PET) pieces

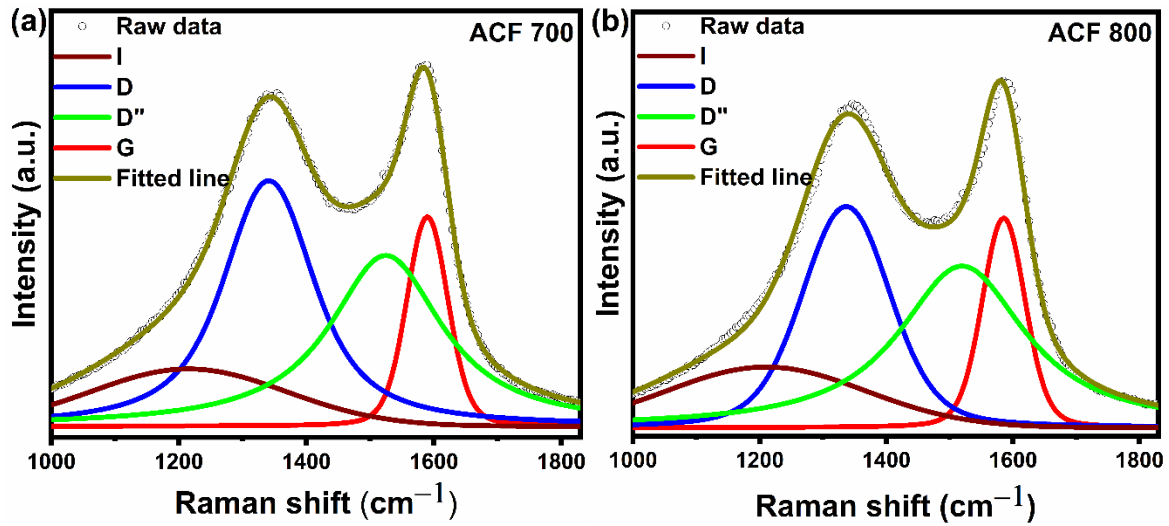

Fig

. S2 Deconvoluted Raman spectra of (a) ACF-700 (b) ACF-800 samples

Table S1: Parameters employed for peak deconvolution

| Sample  | Peak Type | Center  | Height  | Area   | FWHM   | $A_D/A_G$ | $I_D/I_G$ |
|---------|-----------|---------|---------|--------|--------|-----------|-----------|
| ACF-700 | I         | 1215.26 | 517.76  | 198658 | 360.25 | 3.18      | 1.17      |
|         | D         | 1341.01 | 2217.94 | 532301 | 168.8  |           |           |
|         | D''       | 1524.76 | 1542.82 | 511002 | 212.38 |           |           |
|         | G         | 1589.84 | 1891.53 | 167142 | 76.31  |           |           |
| ACF-800 | I         | 1210.3  | 730.04  | 287962 | 370.52 | 2.26      | 1.04      |
|         | D         | 1336.6  | 2661.31 | 520355 | 164.41 |           |           |
|         | D''       | 1519.76 | 1944.12 | 721544 | 239.92 |           |           |
|         | G         | 1585.46 | 2522.5  | 233720 | 63.24  |           |           |
| ACF-900 | I         | 1210.78 | 472.64  | 168899 | 322.58 | 1.84      | 0.81      |
|         | D         | 1340.41 | 2921.62 | 598043 | 130.31 |           |           |
|         | D''       | 1517.96 | 898.85  | 266487 | 188.76 |           |           |
|         | G         | 1577.07 | 3594.27 | 388035 | 36.68  |           |           |

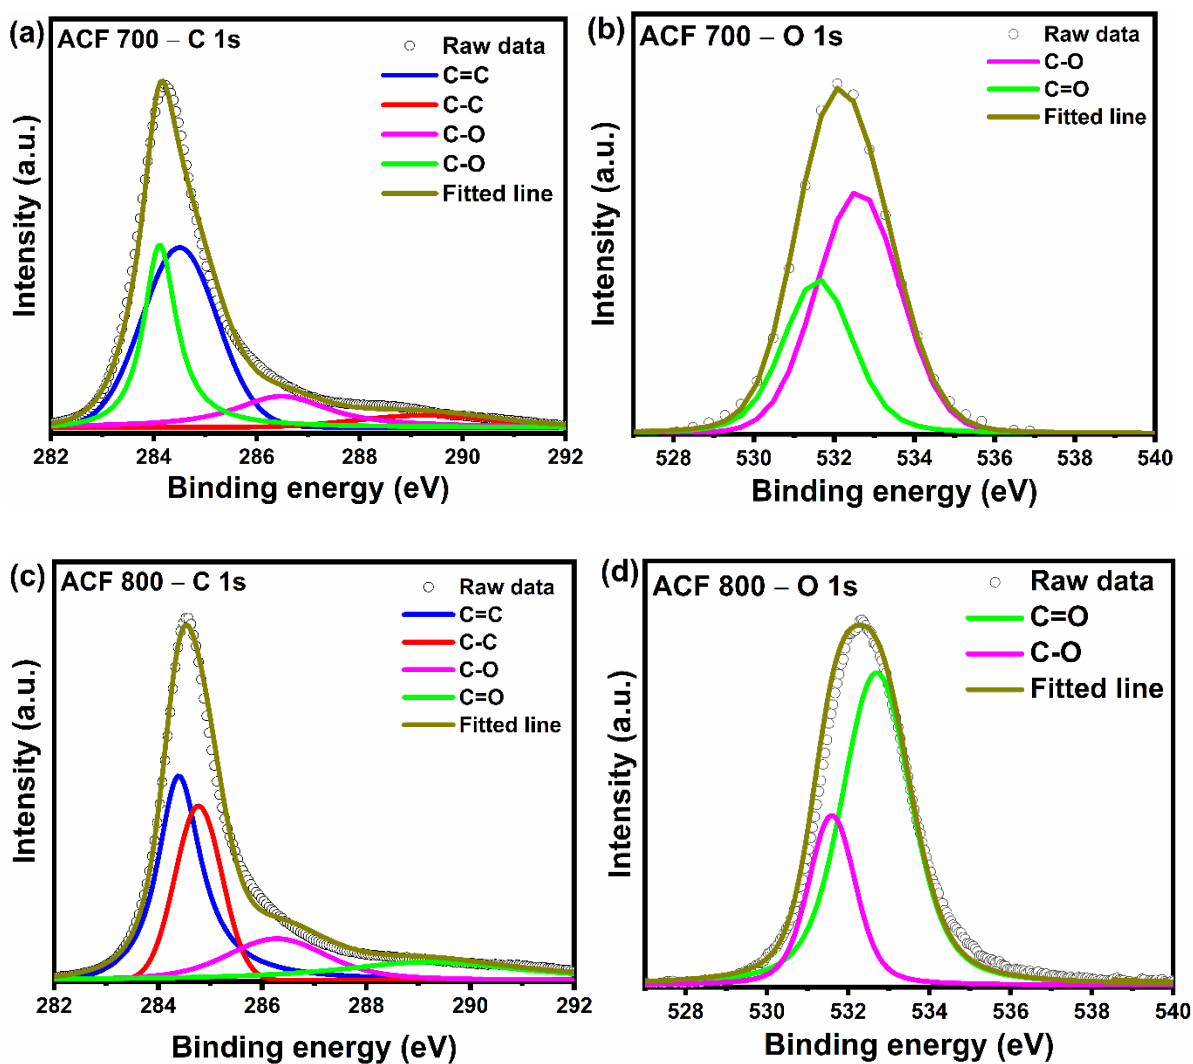

Fig. S3 (a) Deconvoluted C1s spectra of ACF-700 sample (b) Deconvoluted O1s spectra of ACF-700 sample (c) Deconvoluted C1s spectra of ACF-700 sample (d) Deconvoluted O1s spectra of ACF-700 sample

Table S2: The C and O contents of all samples from XPS analysis.

| Sample  | C (wt%) | O (wt%) |
|---------|---------|---------|
| ACF-700 | 75.87   | 24.13   |
| ACF-800 | 85.81   | 14.19   |
| ACf-900 | 94.64   | 5.36    |

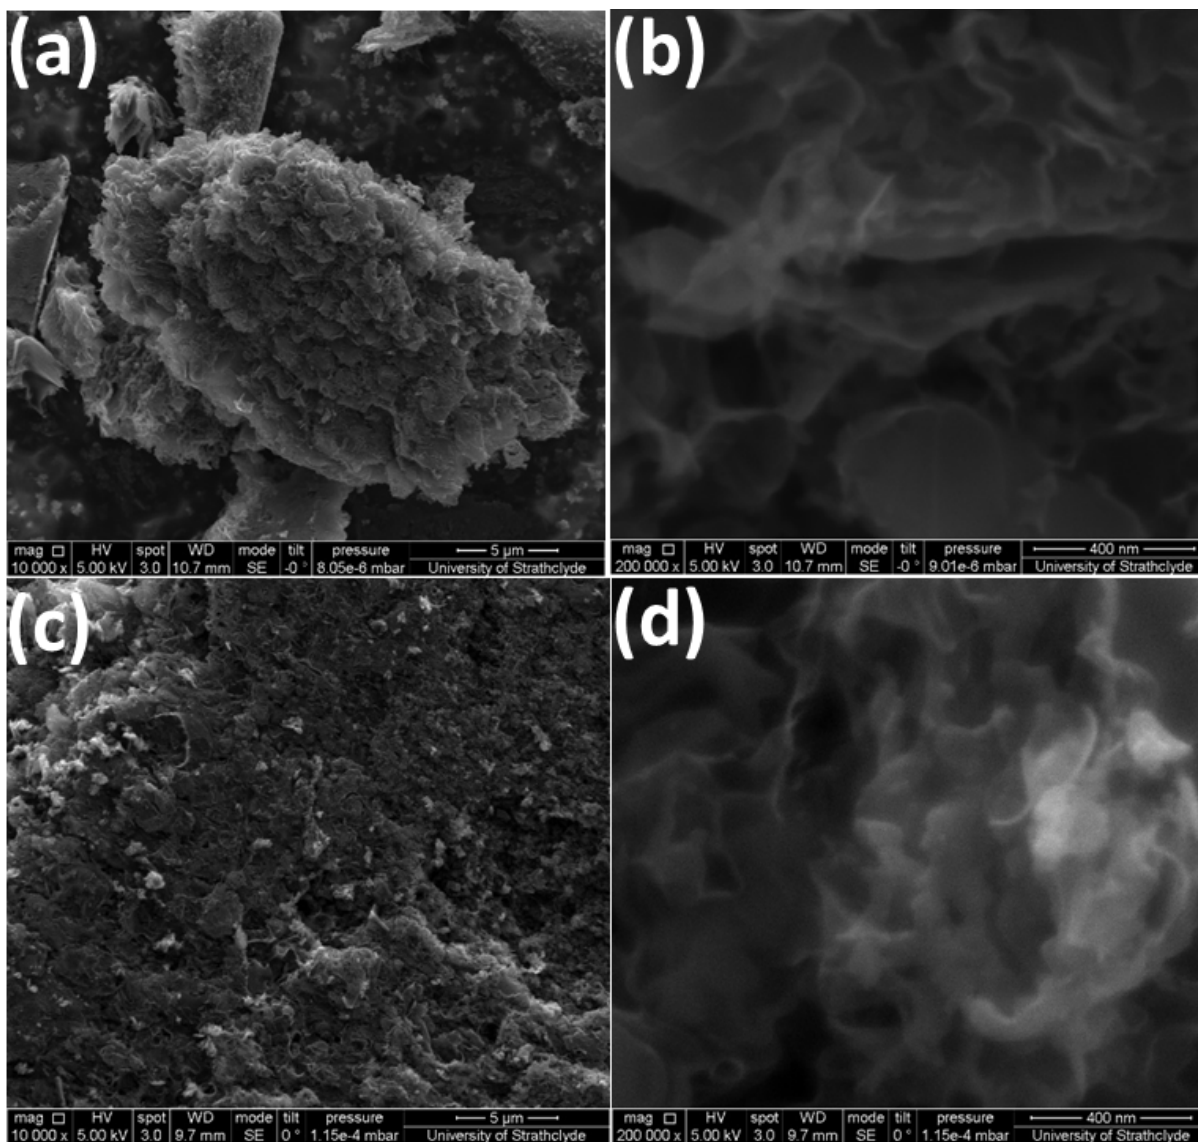

Fig. S4 (a - b) FESEM images of ACF-700 sample (c - d) FESEM images of ACF-800 samples

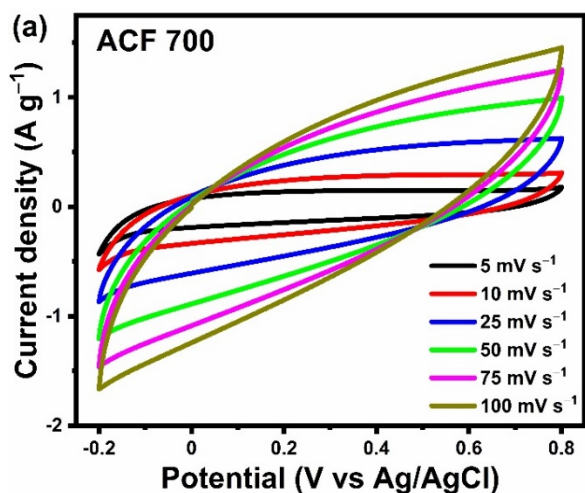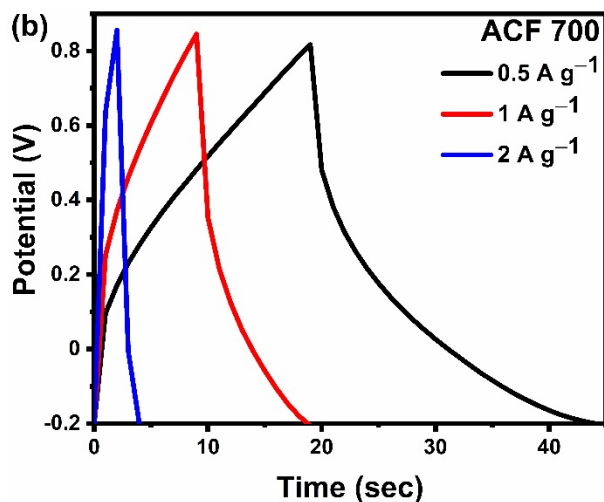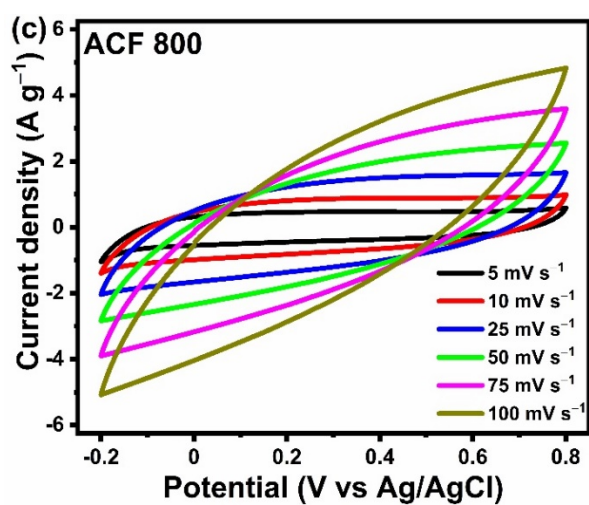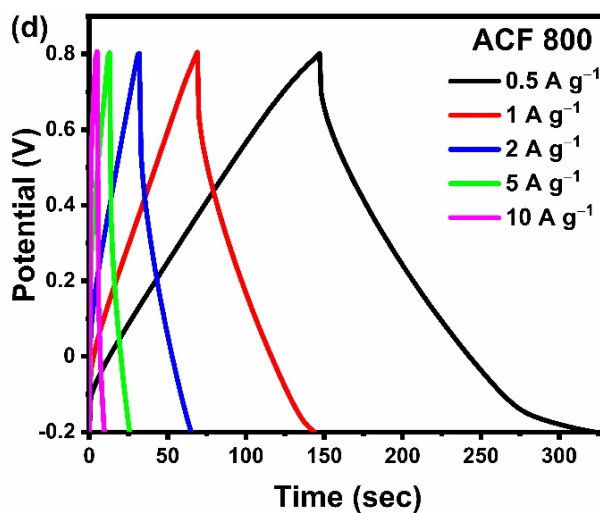

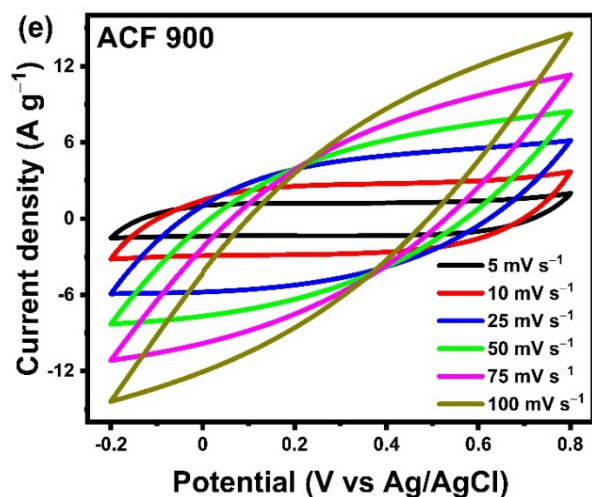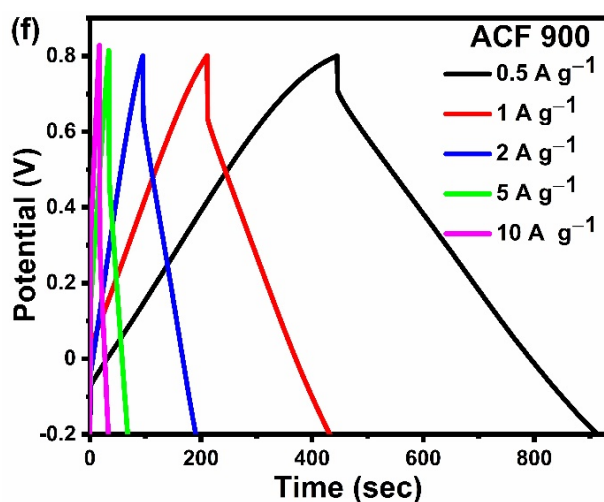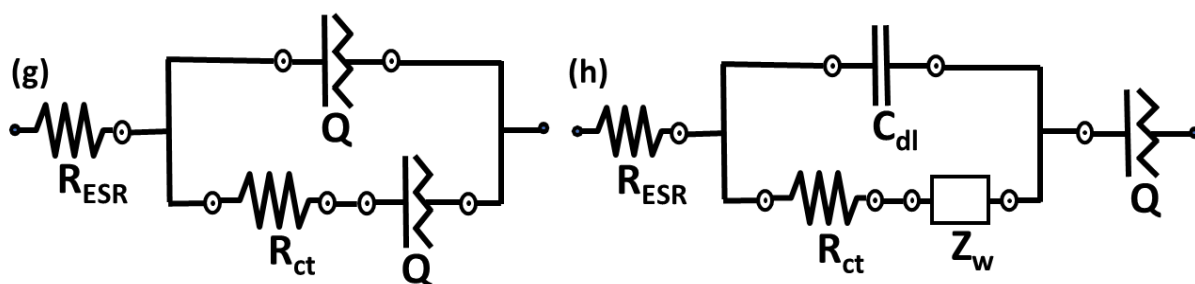

Fig. S5 (a & b) CV graph at different scan rates and GCD at different current densities for ACF-700 electrode (c & d) CV graph at different scan rates and GCD at different current densities for ACF-800 electrode (e & f) CV graph at different scan rates and GCD at different current densities for ACF-900 electrode tested in three-electrode configuration in 1M Na<sub>2</sub>SO<sub>4</sub> electrolyte (g) Equivalent circuit model of ACF-700 (h) Equivalent circuit model of ACF-800
